# Supplementary material for: Geno- and Phenotypic Characteristics of a Klebsiella pneumoniae ST20 Isolate with Unusual Colony Morphology
Source: MDPI journal article supplement (doi:10.3390/microorganisms10102063), 2022-10-19
Supplement: s1 [file s1]

**Table S1.** Metadata for *K. pneumoniae* ST20 genomes used for phylogenetic analysis. *NA*: not applicable (i.e., no metadata provided).

| Sample         | ENA study accession        | Host  | Isolation source                  | Location       | Collection date |
|----------------|----------------------------|-------|-----------------------------------|----------------|-----------------|
| PBIO3459       | PRJEB55904                 | human | blood                             | Germany        | 2021            |
| BioSample      | GenBank assembly accession | Host  | Isolation source                  | Location       | Collection date |
| SAMD00129645   | GCA_004313545.1            | human | blood                             | Japan          | 2014            |
| SAMD00196002   | GCA_015138775.1            | human | NA                                | Japan          | 2018            |
| SAMEA104208303 | GCA_022250695.1            | NA    | NA                                | NA             | NA              |
| SAMEA104208310 | GCA_022250615.1            | NA    | NA                                | NA             | NA              |
| SAMEA104208313 | GCA_022250575.1            | NA    | NA                                | NA             | NA              |
| SAMEA104208315 | GCA_022250535.1            | NA    | NA                                | NA             | NA              |
| SAMEA104208437 | GCA_022248755.1            | NA    | NA                                | NA             | NA              |
| SAMEA104567656 | GCA_902161435.1            | human | faecal                            | United Kingdom | 2018            |
| SAMEA104567807 | GCA_900774905.1            | NA    | NA                                | NA             | NA              |
| SAMEA104590273 | GCA_022255295.1            | human | swab                              | Cambodia       | 2013            |
| SAMEA2073120   | GCA_022244835.1            | human | ET tip                            | Nepal          | 2012            |
| SAMEA2073121   | GCA_022244795.1            | human | ET secretion                      | Nepal          | 2012            |
| SAMEA2073310   | GCA_022244545.1            | human | urine                             | Nepal          | 2012            |
| SAMEA2273552   | GCA_900084805.1            | human | blood                             | United Kingdom | 2002            |
| SAMEA2602992   | GCA_000823085.1            | NA    | NA                                | NA             | NA              |
| SAMEA3356962   | GCA_020149785.1            | NA    | NA                                | NA             | NA              |
| SAMEA3357023   | GCA_904863365.1            | NA    | NA                                | NA             | NA              |
| SAMEA3357158   | GCA_904863405.1            | NA    | NA                                | NA             | NA              |
| SAMEA3357253   | GCA_904866335.1            | NA    | NA                                | NA             | NA              |
| SAMEA3357421   | GCA_904866295.1            | NA    | NA                                | NA             | NA              |
| SAMEA3500082   | GCA_900510685.1            | human | swab                              | Slovakia       | 2014            |
| SAMEA3500088   | GCA_900510785.1            | human | urine                             | Slovakia       | 2014            |
| SAMEA3512056   | GCA_900512395.1            | human | wound secretion                   | Germany        | 2014            |
| SAMEA3515082   | GCA_900513115.1            | human | blood                             | Italy          | 2013            |
| SAMEA3515128   | GCA_900515275.1            | human | blood                             | Italy          | 2013            |
| SAMEA3515130   | GCA_900514195.1            | human | urine                             | Italy          | 2013            |
| SAMEA3515150   | GCA_900514815.1            | human | blood                             | Italy          | 2014            |
| SAMEA3531574   | GCA_900172565.1            | other | sewage                            | United Kingdom | 2014            |
| SAMEA3538565   | GCA_900514055.1            | human | urine                             | Italy          | 2013            |
| SAMEA3538820   | GCA_022291755.1            | NA    | NA                                | NA             | NA              |
| SAMEA3649532   | GCA_022290895.1            | NA    | NA                                | NA             | NA              |
| SAMEA3649558   | GCA_900517475.1            | human | blood                             | Spain          | 2013            |
| SAMEA3649665   | GCA_900500785.1            | human | urine                             | Greece         | 2014            |
| SAMEA3649680   | GCA_900501315.1            | human | puncture fluids                   | Greece         | 2013            |
| SAMEA3727631   | GCA_900506635.1            | human | urine                             | Belgium        | 2014            |
| SAMEA3729705   | GCA_900507805.1            | human | lower respiratory tract secretion | Turkey         | 2013            |
| SAMEA3729744   | GCA_900508505.1            | human | urine                             | Turkey         | 2014            |
| SAMEA3886655   | GCA_022247145.1            | NA    | NA                                | NA             | NA              |
| SAMEA3886656   | GCA_022247045.1            | NA    | NA                                | NA             | NA              |

|               |                 |       |             |                |      |
|---------------|-----------------|-------|-------------|----------------|------|
| SAMEA4362606  | GCA_900173305.1 | human | feces       | United Kingdom | 2015 |
| SAMEA4362608  | GCA_900173335.1 | human | feces       | United Kingdom | 2015 |
| SAMEA4362609  | GCA_900173365.1 | human | feces       | United Kingdom | 2015 |
| SAMEA4362668  | GCA_900173905.1 | human | feces       | United Kingdom | 2015 |
| SAMEA4531897  | GCA_022298775.1 | NA    | NA          | NA             | NA   |
| SAMEA4531985  | GCA_022297115.1 | NA    | NA          | NA             | NA   |
| SAMEA4532230  | GCA_022292975.1 | NA    | NA          | NA             | NA   |
| SAMEA4807837  | GCA_900498415.1 | human | NA          | Germany        | 2014 |
| SAMEA4807844  | GCA_900498585.1 | human | NA          | Germany        | 2014 |
| SAMEA4807846  | GCA_900498385.1 | human | NA          | Germany        | 2014 |
| SAMEA4807847  | GCA_900498595.1 | human | NA          | Germany        | 2014 |
| SAMEA4807849  | GCA_900498475.1 | human | NA          | Germany        | 2014 |
| SAMEA4807853  | GCA_900498405.1 | human | NA          | Germany        | 2014 |
| SAMEA5048777  | GCA_022200005.1 | NA    | NA          | NA             | NA   |
| SAMEA5049787  | GCA_022183305.1 | NA    | NA          | NA             | NA   |
| SAMEA5050265  | GCA_021855905.1 | NA    | NA          | NA             | NA   |
| SAMEA56276668 | GCA_022236885.1 | human | NA          | Ireland        | 2016 |
| SAMEA56282668 | GCA_022236625.1 | human | NA          | Ireland        | 2016 |
| SAMEA56283418 | GCA_022236435.1 | human | NA          | Ireland        | 2016 |
| SAMEA6657263  | GCA_021972375.1 | human | urine       | Denmark        | 2018 |
| SAMEA6657273  | GCA_021972355.1 | human | urine       | Denmark        | 2018 |
| SAMEA6658658  | GCA_022175505.1 | human | clinical    | Cambodia       | 2016 |
| SAMEA7746285  | GCA_916163495.1 | human | urine       | Netherlands    | 2010 |
| SAMEA7773563  | GCA_021979815.1 | human | feces       | Norway         | 2015 |
| SAMEA7773566  | GCA_021979795.1 | human | feces       | Norway         | 2015 |
| SAMEA7773587  | GCA_021979515.1 | human | feces       | Norway         | 2015 |
| SAMEA7773609  | GCA_021979135.1 | human | feces       | Norway         | 2015 |
| SAMEA7773665  | GCA_021978415.1 | human | feces       | Norway         | 2015 |
| SAMEA7773750  | GCA_021977475.1 | human | feces       | Norway         | 2015 |
| SAMEA7773776  | GCA_021977175.1 | human | feces       | Norway         | 2015 |
| SAMEA7773800  | GCA_021976895.1 | human | feces       | Norway         | 2015 |
| SAMEA7773848  | GCA_021976355.1 | human | feces       | Norway         | 2015 |
| SAMEA7773889  | GCA_021975675.1 | human | feces       | Norway         | 2015 |
| SAMEA7773911  | GCA_021975395.1 | human | feces       | Norway         | 2015 |
| SAMEA7773923  | GCA_021975255.1 | human | feces       | Norway         | 2015 |
| SAMEA7773931  | GCA_021975155.1 | human | feces       | Norway         | 2015 |
| SAMEA7773986  | GCA_021974415.1 | human | feces       | Norway         | 2021 |
| SAMEA7774006  | GCA_021974155.1 | human | feces       | Norway         | 2015 |
| SAMEA8217956  | GCA_021820075.1 | human | clinical    | Germany        | 2018 |
| SAMEA8581355  | GCA_021895695.1 | human | NA          | Pakistan       | 2016 |
| SAMEA882006   | GCA_022260635.1 | human | urine       | Australia      | 2002 |
| SAMEA882046   | GCA_022260575.1 | human | urine       | Australia      | 2002 |
| SAMEA882199   | GCA_022259635.1 | human | respiratory | Viet Nam       | 2003 |
| SAMEA88384168 | GCA_022235845.1 | human | NA          | Ireland        | 2017 |
| SAMEA8948220  | GCA_021924145.1 | human | blood       | Norway         | 2005 |
| SAMEA8948260  | GCA_021921165.1 | human | blood       | Norway         | 2005 |
| SAMEA8948265  | GCA_021921105.1 | human | blood       | Norway         | 2005 |
| SAMEA8948266  | GCA_021921125.1 | human | blood       | Norway         | 2005 |
| SAMEA8948330  | GCA_021925305.1 | human | blood       | Norway         | 2001 |

|              |                 |       |                 |                |      |
|--------------|-----------------|-------|-----------------|----------------|------|
| SAMEA8948347 | GCA_021925005.1 | human | blood           | Norway         | 2001 |
| SAMEA8948367 | GCA_021924805.1 | human | blood           | Norway         | 2001 |
| SAMEA8948511 | GCA_021919465.1 | human | blood           | Norway         | 2009 |
| SAMEA8948530 | GCA_021919205.1 | human | blood           | Norway         | 2009 |
| SAMEA8948641 | GCA_021917925.1 | human | urine           | Norway         | 2012 |
| SAMEA8948645 | GCA_021917825.1 | human | urine           | Norway         | 2012 |
| SAMEA8948731 | GCA_021916865.1 | human | blood           | Norway         | 2015 |
| SAMEA8948745 | GCA_021929555.1 | human | blood           | Norway         | 2015 |
| SAMEA8948747 | GCA_021929515.1 | human | blood           | Norway         | 2015 |
| SAMEA8948752 | GCA_021929415.1 | human | blood           | Norway         | 2015 |
| SAMEA8948778 | GCA_021929135.1 | human | blood           | Norway         | 2015 |
| SAMEA8948798 | GCA_021928935.1 | human | blood           | Norway         | 2015 |
| SAMEA8948817 | GCA_021928715.1 | human | blood           | Norway         | 2015 |
| SAMEA8948824 | GCA_021926005.1 | human | blood           | Norway         | 2015 |
| SAMEA8948838 | GCA_021928375.1 | human | blood           | Norway         | 2015 |
| SAMEA8948853 | GCA_021928155.1 | human | blood           | Norway         | 2015 |
| SAMEA8948855 | GCA_021928135.1 | human | blood           | Norway         | 2015 |
| SAMEA8948861 | GCA_021928055.1 | human | blood           | Norway         | 2015 |
| SAMEA8948862 | GCA_021925945.1 | human | blood           | Norway         | 2015 |
| SAMEA8948906 | GCA_021925825.1 | human | blood           | Norway         | 2015 |
| SAMEA8948921 | GCA_021927205.1 | human | blood           | Norway         | 2015 |
| SAMN02927722 | GCA_022304375.1 | human | NA              | Canada         | 2009 |
| SAMN02927817 | GCA_022301875.1 | human | NA              | USA            | 2006 |
| SAMN03002380 | GCA_002895645.2 | human | clinical        | Netherlands    | 2012 |
| SAMN03737944 | GCA_001038365.1 | human | urine           | USA            | 2013 |
| SAMN03853256 | GCA_022266615.1 | other | retail chicken  | USA            | 2012 |
| SAMN04357353 | GCA_022314735.1 | human | blood           | United Kingdom | 2009 |
| SAMN04357362 | GCA_022314635.1 | human | blood           | United Kingdom | 2010 |
| SAMN04357385 | GCA_022313335.1 | human | blood           | United Kingdom | 2010 |
| SAMN04357387 | GCA_022313355.1 | human | blood           | United Kingdom | 2010 |
| SAMN05770822 | GCA_022266285.1 | human | NA              | Singapore      | 2014 |
| SAMN05770868 | GCA_022266015.1 | human | NA              | Singapore      | 2015 |
| SAMN05956096 | GCA_001902815.4 | human | respiratory     | USA            | 2013 |
| SAMN05960875 | GCA_002186545.1 | human | blood           | Nigeria        | 2009 |
| SAMN06112183 | GCA_022273395.1 | human | liver abscess   | Singapore      | NA   |
| SAMN06437422 | GCA_022079125.1 | human | blood           | USA            | 2012 |
| SAMN06437474 | GCA_022089065.1 | human | respiratory     | USA            | 2012 |
| SAMN06437481 | GCA_022089205.1 | human | urine           | USA            | 2012 |
| SAMN06437509 | GCA_022091135.1 | human | abscess         | USA            | 2012 |
| SAMN06438484 | GCA_022069565.1 | human | drain           | USA            | 2014 |
| SAMN06546423 | GCA_022300095.1 | human | sputum          | USA            | 2016 |
| SAMN06629650 | GCA_002855175.1 | human | NA              | Colombia       | 2010 |
| SAMN06629698 | GCA_002853815.1 | human | NA              | Colombia       | 2002 |
| SAMN07310304 | GCA_019426495.1 | NA    | hand wash basin | Germany        | 2004 |
| SAMN07525395 | GCA_022286655.1 | human | drain           | USA            | 2017 |
| SAMN07525412 | GCA_022283905.1 | human | blood           | USA            | 2017 |
| SAMN07525424 | GCA_022284285.1 | human | urine           | USA            | 2017 |
| SAMN07525438 | GCA_022285115.1 | human | organ           | USA            | 2017 |
| SAMN07525440 | GCA_022285065.1 | human | urine           | USA            | 2017 |

|              |                 |       |                   |             |      |
|--------------|-----------------|-------|-------------------|-------------|------|
| SAMN08148173 | GCA_014902355.1 | human | NA                | USA         | NA   |
| SAMN08148239 | GCA_014902985.1 | human | NA                | USA         | NA   |
| SAMN08148240 | GCA_014902835.1 | human | NA                | USA         | NA   |
| SAMN08148299 | GCA_014902715.1 | human | NA                | USA         | NA   |
| SAMN08382725 | GCA_022322845.1 | human | blood             | Singapore   | 2012 |
| SAMN08382734 | GCA_022323505.1 | human | blood             | Singapore   | 2012 |
| SAMN08382744 | GCA_022323405.1 | human | blood             | Singapore   | 2013 |
| SAMN08382755 | GCA_022323045.1 | human | blood             | Singapore   | 2011 |
| SAMN08382758 | GCA_022323105.1 | human | blood             | Singapore   | 2011 |
| SAMN09266884 | GCA_003195615.1 | human | blood             | USA         | 2017 |
| SAMN09266899 | GCA_003196655.1 | human | blood             | USA         | 2017 |
| SAMN09475209 | GCA_019679205.1 | other | NA                | Germany     | 2017 |
| SAMN09981252 | GCA_008121015.1 | human | stool             | USA         | NA   |
| SAMN09981274 | GCA_008082375.1 | human | stool             | USA         | NA   |
| SAMN10058847 | GCA_022270315.1 | human | blood             | Singapore   | 2015 |
| SAMN10086811 | GCA_014840295.1 | human | wound             | Pakistan    | 2016 |
| SAMN10241289 | GCA_003861085.1 | human | patient fluids    | USA         | 2017 |
| SAMN10522466 | GCA_004137665.1 | NA    | feces             | China       | 2015 |
| SAMN11579532 | GCA_018108585.1 | human | wound swab        | Malaysia    | 2016 |
| SAMN11979504 | GCA_022174085.1 | human | rectal            | Singapore   | 2014 |
| SAMN11979506 | GCA_022173985.1 | human | rectal swab       | Singapore   | 2013 |
| SAMN11979507 | GCA_022173945.1 | human | sputum            | Singapore   | 2013 |
| SAMN11979509 | GCA_022173405.1 | human | rectal swab       | Singapore   | 2014 |
| SAMN11979511 | GCA_022173205.1 | human | stool/rectal swab | Singapore   | 2014 |
| SAMN11979515 | GCA_022173085.1 | human | stool/rectal swab | Singapore   | 2014 |
| SAMN12109314 | GCA_016617225.1 | NA    | blood             | NA          | NA   |
| SAMN12109315 | GCA_016617195.1 | NA    | blood             | NA          | NA   |
| SAMN12109321 | GCA_016617095.1 | NA    | blood             | NA          | NA   |
| SAMN12109322 | GCA_016617015.1 | NA    | blood             | NA          | NA   |
| SAMN12109325 | GCA_016616945.1 | NA    | blood             | NA          | NA   |
| SAMN12109330 | GCA_016616935.1 | NA    | blood             | NA          | NA   |
| SAMN12109374 | GCA_016615935.1 | NA    | blood             | NA          | NA   |
| SAMN12109375 | GCA_016615895.1 | NA    | blood             | NA          | NA   |
| SAMN12109462 | GCA_016614335.1 | NA    | blood             | NA          | NA   |
| SAMN12109464 | GCA_016614245.1 | NA    | blood             | NA          | NA   |
| SAMN12212120 | GCA_020115175.1 | human | blood             | Switzerland | 2017 |
| SAMN12212290 | GCA_020116535.1 | human | urine             | Switzerland | 2017 |
| SAMN12250575 | GCA_010598785.1 | human | lung              | USA         | 2015 |
| SAMN12250797 | GCA_010590075.1 | human | lung              | USA         | 2016 |
| SAMN12250803 | GCA_010597245.1 | human | lung              | USA         | 2016 |
| SAMN12289391 | GCA_022132845.1 | human | NA                | Australia   | 2009 |
| SAMN13153767 | GCA_009661155.1 | human | blood             | Russia      | 2018 |
| SAMN13301642 | GCA_016635585.1 | human | blood             | Australia   | 2015 |
| SAMN13829629 | GCA_022054415.1 | human | rectal swab       | Qatar       | 2018 |
| SAMN13915673 | GCA_016643405.1 | human | NA                | Portugal    | NA   |
| SAMN14008692 | GCA_018137325.1 | human | NA                | Mexico      | 2000 |
| SAMN14008695 | GCA_018137275.1 | human | NA                | Mexico      | 2000 |
| SAMN14379877 | GCA_014654945.1 | human | NA                | China       | 2019 |
| SAMN14609909 | GCA_012968365.1 | human | blood             | South Korea | 2016 |

|              |                 |       |                     |                |      |
|--------------|-----------------|-------|---------------------|----------------|------|
| SAMN14851502 | GCA_021842725.1 | human | swab                | Singapore      | 2013 |
| SAMN14967546 | GCA_014837535.1 | human | clinical            | USA            | 2019 |
| SAMN14967661 | GCA_014833295.1 | human | NA                  | USA            | 2017 |
| SAMN15148642 | GCA_013736155.1 | other | wastewater influent | United Kingdom | 2017 |
| SAMN15148738 | GCA_014103065.1 | other | wastewater influent | United Kingdom | 2017 |
| SAMN15374758 | GCA_017922235.1 | human | NA                  | Malawi         | 2013 |
| SAMN15831847 | GCA_014289915.1 | human | NA                  | China          | 2008 |
| SAMN15832080 | GCA_014283815.1 | human | NA                  | China          | 2016 |
| SAMN15868508 | GCA_022164965.1 | human | urine               | USA            | 2016 |
| SAMN16125015 | GCA_015356355.1 | other | sewage              | NA             | 2019 |
| SAMN16357453 | GCA_016903255.1 | human | NA                  | USA            | NA   |
| SAMN16427127 | GCA_014982705.1 | human | stool               | Spain          | 2019 |
| SAMN16614903 | GCA_021823485.1 | human | bone                | USA            | 2019 |
| SAMN16823204 | GCA_022041575.1 | human | NA                  | USA            | 2017 |
| SAMN16823209 | GCA_022041735.2 | human | rectal              | USA            | 2017 |
| SAMN16824574 | GCA_022028395.1 | human | NA                  | Singapore      | 2015 |
| SAMN16824660 | GCA_022027115.1 | human | NA                  | Singapore      | 2016 |
| SAMN16842674 | GCA_022038895.1 | human | trachael aspirate   | USA            | 2019 |
| SAMN16980962 | GCA_022033855.2 | human | NA                  | USA            | 2017 |
| SAMN17371801 | GCA_018439785.1 | human | stool/rectal swab   | Germany        | 2016 |
| SAMN17766485 | GCA_022789545.1 | other | marine environment  | Norway         | 2019 |
| SAMN17766489 | GCA_022789425.1 | other | marine environment  | Norway         | 2019 |
| SAMN17766496 | GCA_022789315.1 | other | marine environment  | Norway         | 2019 |
| SAMN17766503 | GCA_022789245.1 | other | marine environment  | Norway         | 2020 |
| SAMN17766513 | GCA_022789045.1 | other | marine environment  | Norway         | 2020 |
| SAMN17766514 | GCA_022789005.1 | other | marine environment  | Norway         | 2020 |
| SAMN18822993 | GCA_021973675.1 | human | rectal swab         | USA            | 2021 |
| SAMN18874704 | GCA_019930085.1 | human | wound               | Afghanistan    | 2013 |
| SAMN18978597 | GCA_022551475.1 | human | rectal              | USA            | 2017 |
| SAMN19016749 | GCA_021953385.1 | human | respiratory         | USA            | 2017 |
| SAMN19374585 | GCA_018789905.1 | other | water               | South Africa   | 2018 |
| SAMN19658408 | GCA_021936275.1 | human | blood               | Canada         | 2008 |
| SAMN19797021 | GCA_019053895.1 | human | sputum              | China          | 2016 |
| SAMN19797042 | GCA_019053355.1 | human | blood               | China          | 2018 |
| SAMN19797043 | GCA_019053395.1 | human | urine               | China          | 2018 |
| SAMN19855090 | GCA_022991025.1 | human | blood               | USA            | 2018 |
| SAMN19855117 | GCA_022999365.1 | human | blood               | USA            | 2018 |
| SAMN19855118 | GCA_022984585.1 | human | blood               | USA            | 2018 |
| SAMN19855546 | GCA_022998685.1 | human | stool               | USA            | 2018 |
| SAMN20033658 | GCA_021933475.1 | human | swab                | Australia      | 2020 |
| SAMN20104173 | GCA_021935855.2 | human | toe                 | USA            | 2021 |
| SAMN20110663 | GCA_022012095.1 | human | drainage            | Germany        | 2016 |
| SAMN20524809 | GCA_023467275.1 | human | NA                  | Singapore      | NA   |
| SAMN20966795 | GCA_023037515.1 | NA    | NA                  | Singapore      | NA   |
| SAMN20967060 | GCA_023039755.1 | NA    | NA                  | Singapore      | NA   |
| SAMN20967074 | GCA_023465775.1 | NA    | NA                  | Singapore      | NA   |
| SAMN20967113 | GCA_023036735.1 | NA    | NA                  | Singapore      | NA   |
| SAMN20967405 | GCA_023041155.1 | NA    | NA                  | Singapore      | NA   |
| SAMN21922876 | GCA_021502945.1 | human | rectal swab         | Pakistan       | 2016 |

|              |                 |       |             |                |      |
|--------------|-----------------|-------|-------------|----------------|------|
| SAMN22045166 | GCA_021904335.1 | human | NA          | USA            | 2021 |
| SAMN23040723 | GCA_023025805.1 | human | blood       | China          | 2018 |
| SAMN23224736 | GCA_022861205.1 | human | NA          | China          | 2018 |
| SAMN23521389 | GCA_021897075.1 | human | NA          | USA            | 2021 |
| SAMN24009778 | GCA_021262305.1 | human | blood       | USA            | NA   |
| SAMN24009794 | GCA_021262085.1 | human | blood       | USA            | NA   |
| SAMN24020413 | GCA_022116155.1 | human | NA          | United Kingdom | 2016 |
| SAMN24020516 | GCA_022106455.1 | human | NA          | United Kingdom | 2016 |
| SAMN24020995 | GCA_022146665.1 | human | NA          | United Kingdom | 2016 |
| SAMN26101548 | GCA_022431305.1 | other | milk        | USA            | 2020 |
| SAMN26366690 | GCA_022499505.1 | human | urine       | Australia      | 2001 |
| SAMN26366696 | GCA_022498265.1 | human | blood       | Australia      | 2001 |
| SAMN26366712 | GCA_022499325.1 | human | urine       | Australia      | 2001 |
| SAMN26366729 | GCA_022500005.1 | human | urine       | Australia      | 2002 |
| SAMN26368956 | GCA_023033685.1 | human | urine       | Australia      | 2020 |
| SAMN26369082 | GCA_023028205.1 | human | sputum      | Australia      | 2020 |
| SAMN26369217 | GCA_023030245.1 | human | urine       | Australia      | 2020 |
| SAMN26369305 | GCA_023033635.1 | human | blood       | Australia      | 2020 |
| SAMN26417635 | GCA_022470475.1 | human | sputum      | USA            | 2021 |
| SAMN26976180 | GCA_023206495.1 | human | rectal swab | USA            | 2017 |
| SAMN26976209 | GCA_023311735.1 | human | rectal swab | USA            | 2017 |
| SAMN26976276 | GCA_023311615.1 | human | rectal swab | USA            | 2017 |
| SAMN26976323 | GCA_023207175.1 | human | rectal swab | USA            | 2018 |
| SAMN26976365 | GCA_023207895.1 | human | rectal swab | USA            | 2018 |
| SAMN26976393 | GCA_023462755.1 | human | rectal swab | USA            | 2018 |
| SAMN26976425 | GCA_023314275.1 | human | rectal swab | USA            | 2018 |
| SAMN28097314 | GCA_023829615.1 | human | sputum      | Thailand       | 2017 |
| SAMN28743183 | GCA_023584565.1 | human | rectal swab | Australia      | 2019 |
